# Supplementary material for: A versatile microfluidic device for high throughput production of microparticles and cell microencapsulation
Source: Royal Society of Chemistry journal article supplement (doi:10.1039/c6lc01568a), 2017-01-01
Supplement: c6lc01568a1.pdf [file c6lc01568a1.pdf]

Supplementary information

**High throughput and versatile production of biocompatible microparticles with  
controlled physiochemical properties using a robust microfluidic platform**

*Samin Akbari, Tohid Pirbodaghi, Roger D. Kamm, Paula T. Hammond\**

## Supplementary table

Supplementary Table S1. Fluid properties and maximum operable flow rates of different PEGda concentration solutions. Capillary numbers of the dispersed and continuous liquid phases and the Weber number of the dispersed liquid phase is calculated at the maximum operable flow rates.

| <b>PEGda<br/>Concentration</b> | <b><math>\rho_d</math><br/>(g mm<sup>-3</sup>)</b> | <b><math>\mu_d</math><br/>(mPa.s)</b> | <b><math>\gamma</math><br/>(mN mm<sup>-1</sup>)</b> | <b><math>Q_d^{max}</math><br/>(<math>\mu\text{L hr}^{-1}</math>)</b> | <b><math>Ca_d</math></b> | <b><math>Ca_c</math></b> | <b><math>We_d</math></b> |
|--------------------------------|----------------------------------------------------|---------------------------------------|-----------------------------------------------------|----------------------------------------------------------------------|--------------------------|--------------------------|--------------------------|
| 20%                            | 1.024                                              | 2.18                                  | 1.69                                                | 3000                                                                 | 0.54                     | 6.2                      | 5.3                      |
| 40%                            | 1.048                                              | 4.80                                  | 1.30                                                | 800                                                                  | 0.41                     | 2.2                      | 0.5                      |
| 80%                            | 1.096                                              | 29.00                                 | 1.15                                                | 400                                                                  | 1.41                     | 1.2                      | 0.15                     |

## Supplementary figures

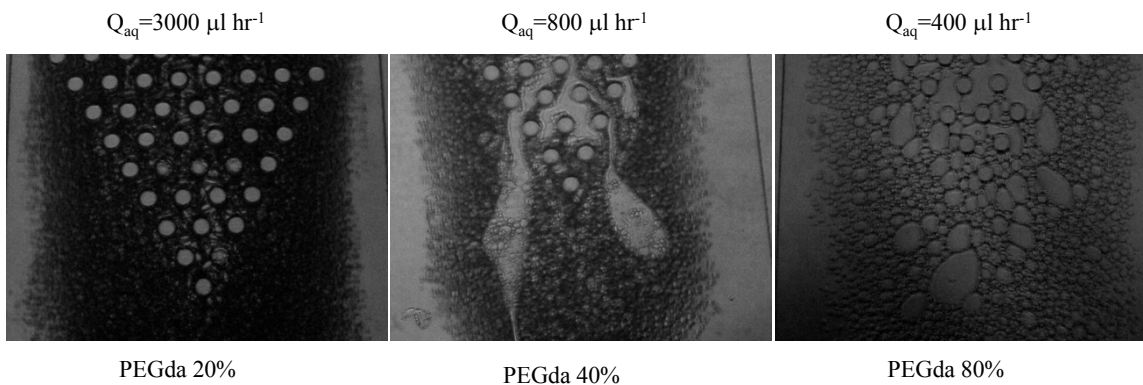

Figure S1. Higher PEG concentration solutions with higher viscosity and density jet at lower aqueous flow rates.

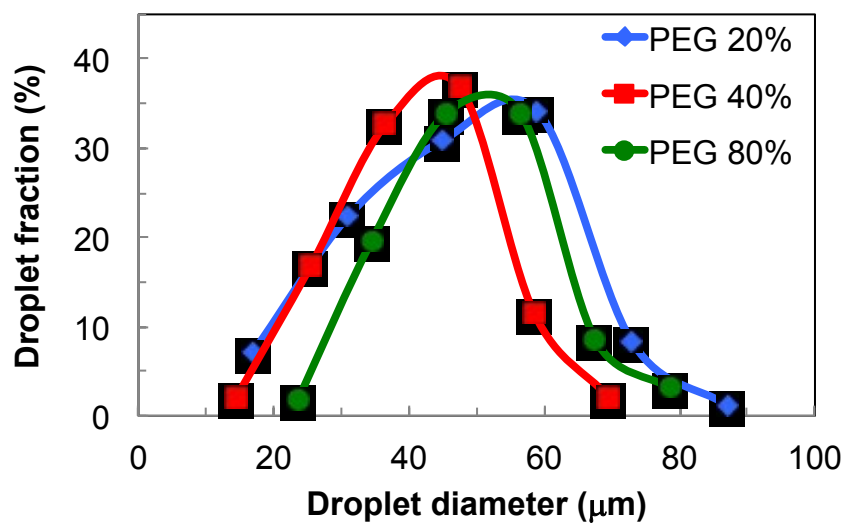

Figure S2. Size distribution of the microdroplets generated from different PEGda concentrations using a device with pillar geometry of  $D_p = 50 \mu\text{m}$ ,  $S_p = 50 \mu\text{m}$  and at flow rates of  $Q_{aq} = 50 \mu\text{L hr}^{-1}$ ,  $Q_o = 100 \mu\text{L hr}^{-1}$ .

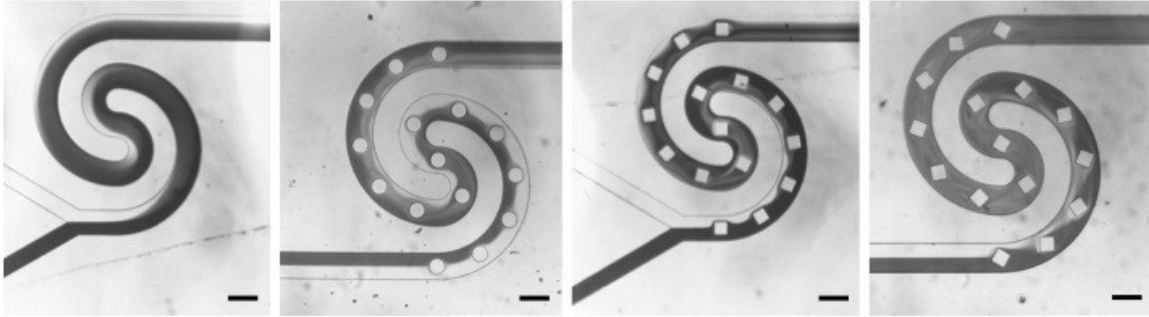

Figure S3. Mixing efficiency of spiral mixers with various micropost geometries embedded inside their microchannel. Adding the microposts further perturbs the flow and enhances the mixing. The mixer with embedded square microposts, which are asymmetrically aligned with the flow path, has the best mixing efficiency. Channel width is  $150\ \mu\text{m}$  and the microposts diameter or length is  $80\ \mu\text{m}$ . Both solutions are water; one with added ink to clarify the mixing and the operating flow rate is  $6\ \text{ml hr}^{-1}$ . Scale bar is  $200\ \mu\text{m}$ .

## References

- [1] F. Hansen, G. Rødseth, *Journal of colloid and interface science* 1991, 141, 1.
